# Supplementary material
Source: MDPI journal article supplement (https://www.mdpi.com/2072-4292/14/21/5421)
Supplement: s1 [file s1]

## Article

# Estimation of Water Balance for Anticipated Land Use in the Potohar Plateau of the Indus Basin using SWAT

Muhammad Idrees<sup>1</sup>, Shakil Ahmad<sup>1,\*</sup>, Muhammad Wasif Khan<sup>1</sup>, Zakir Hussain Dahri<sup>2</sup>, Khalil Ahmad<sup>3</sup>, Muhammad Azmat<sup>1</sup> and Irfan Ahmad Rana<sup>1</sup>

<sup>1</sup> School of Civil and Environmental Engineering (SCEE), National University of Sciences and Technology (NUST), Sector H-12, Islamabad 44000, Pakistan

<sup>2</sup> Pakistan Agricultural Research Council, Sector G-5, Islamabad 44000, Pakistan

<sup>3</sup> Department of Civil and Environmental Engineering, King Abdulaziz University, Jeddah 22254, Saudi Arabia

\* Correspondence: shakilahmad@nice.nust.edu.pk; Tel.: +92-51-90854614

**Table S1.** Description of satellite imagery acquisition.

| Sr. No. | LULC Year | Source      | Resolution | Acquisition Date | Cloud Cover |
|---------|-----------|-------------|------------|------------------|-------------|
| 1       | LULC 1990 | Landsat-5   | 30 m       | 24-05-1990       | 1%          |
| 2       | LULC 2000 | Landsat-7   | 30 m       | 13-06-2000       | 1%          |
| 3       | LULC 2010 | Landsat-7   | 30 m       | 18-06-2010       | 2%          |
| 4       | LULC 2020 | Sentinel-2A | 10 m       | 29-06-2020       | 0%          |

**Table S2.** Details of hydrometric data acquisition.

| Sr. No. | Discharge Gauge           | Year                       | Source                                  |
|---------|---------------------------|----------------------------|-----------------------------------------|
| 1       | Soan at Dhoke Pathan      | 01-Jan-1991 to 31-Dec-2007 | Surface Water Hydrology Project (WAPDA) |
| 2       | Kanshi River near Pa-lote | 01-Jan-1991 to 31-Dec-2007 |                                         |
| 3       | Haro River at Gurri-ala   | 01-Jan-1980 to 31-Dec-2007 |                                         |

**Table S3.** Accuracy assessment of historical LULC's.

| LULC                 | 1990   |        | 2000   |        | 2010   |        | 2020   |        |
|----------------------|--------|--------|--------|--------|--------|--------|--------|--------|
|                      | U%     | P%     | U%     | P%     | U%     | P%     | U%     | P%     |
| Water                | 97.00  | 100.00 | 95.00  | 100.00 | 96.00  | 100.00 | 98.00  | 100.00 |
| Agriculture          | 82.00  | 82.00  | 79.00  | 84.04  | 85.00  | 80.95  | 89.00  | 84.76  |
| Forest               | 92.00  | 92.93  | 98.00  | 80.99  | 94.00  | 94.95  | 100.00 | 93.46  |
| Barren               | 85.00  | 69.11  | 74.00  | 68.52  | 85.00  | 64.89  | 96.00  | 78.69  |
| Built-up             | 80.00  | 98.77  | 80.00  | 97.56  | 66.00  | 95.65  | 67.00  | 98.53  |
| Overall Accuracy (%) | 83.80  |        | 85.20  |        | 85.80  |        | 87.20  |        |
| Kappa Coefficient    | 0.7975 |        | 0.8150 |        | 0.8225 |        | 0.8475 |        |

**Table S4.** Driving factors used to prepare the suitability matrix for LULC projection.

| Sr. No. | Parameters Type           | Parameter                    | Source                                             |
|---------|---------------------------|------------------------------|----------------------------------------------------|
| 1       | Socio-economic Parameters | Population Density           | Diva.GIS                                           |
| 2       |                           | Gross Domestic Product (GDP) | Socioeconomic Data and Applications Center (SEDAC) |
| 3       | Spatial Parameters        | Elevation Map                | ALOS PALSAR                                        |
| 4       |                           | Slope Map                    | ALOS PALSAR                                        |
| 5       |                           | Aspect Ratio Map             | USGS                                               |
| 6       |                           | Distance from Roads          | Diva.GIS                                           |
| 7       |                           | Distance from Railways       | Diva.GIS                                           |
| 8       |                           | Distance from Water Bodies   | Diva.GIS                                           |

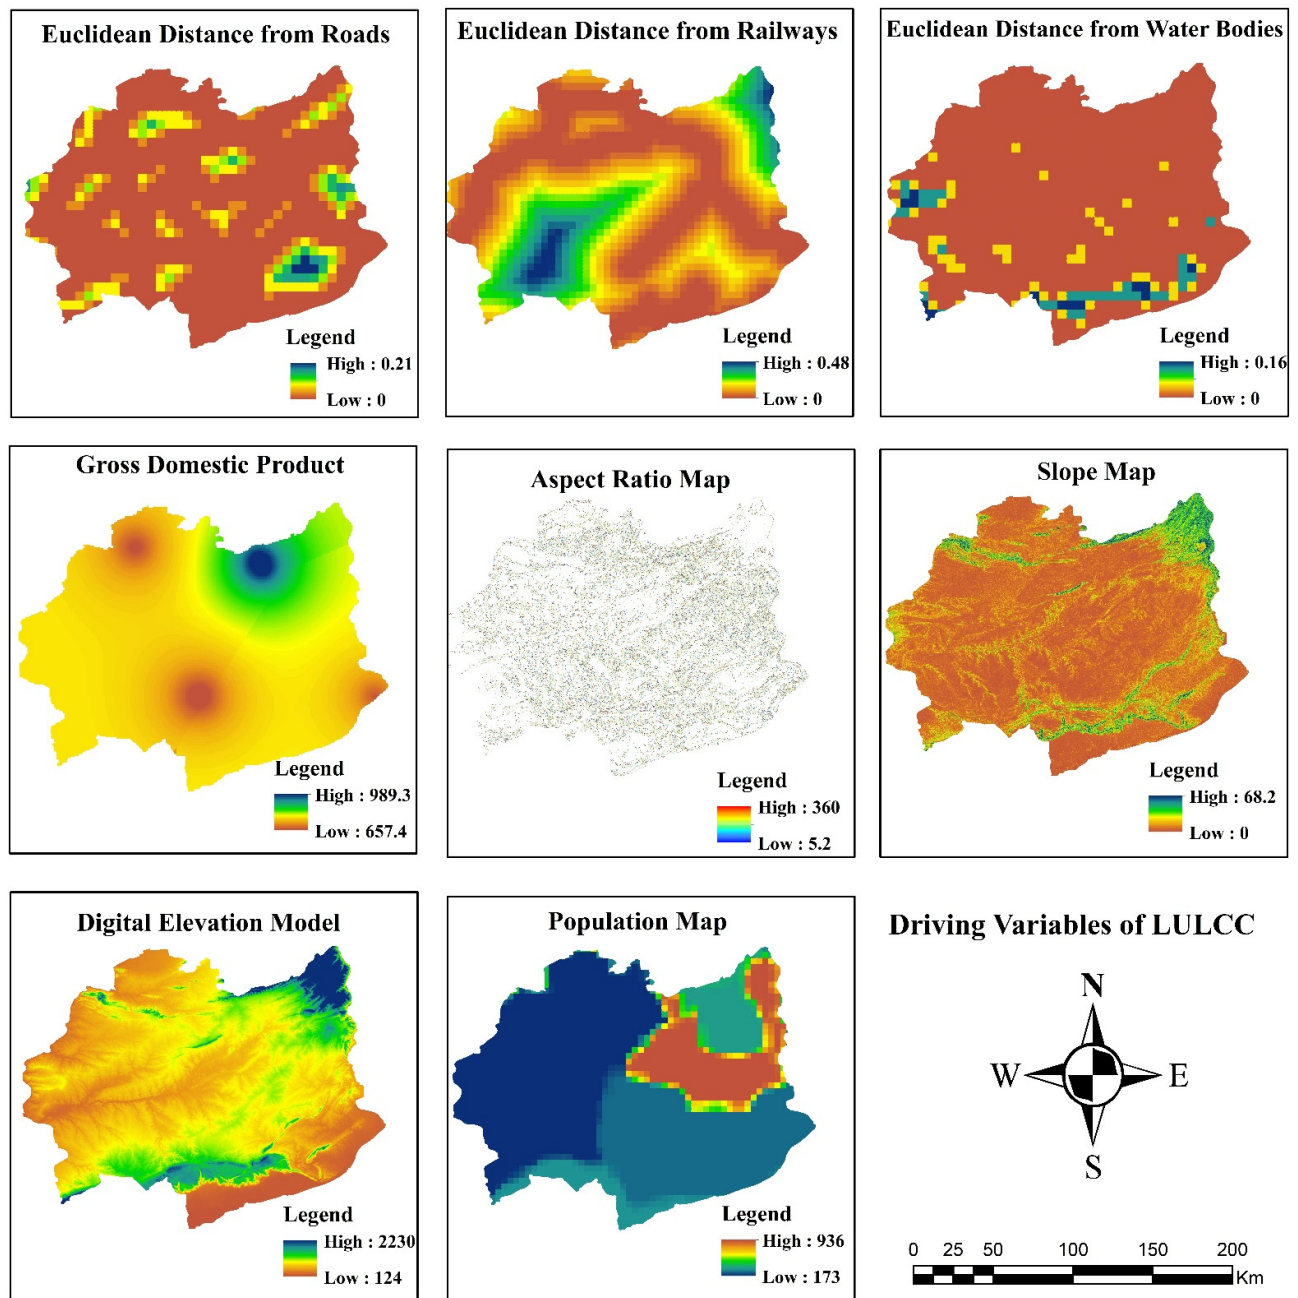

Figure S1. Spatial Maps of driving parameters of LULC change.

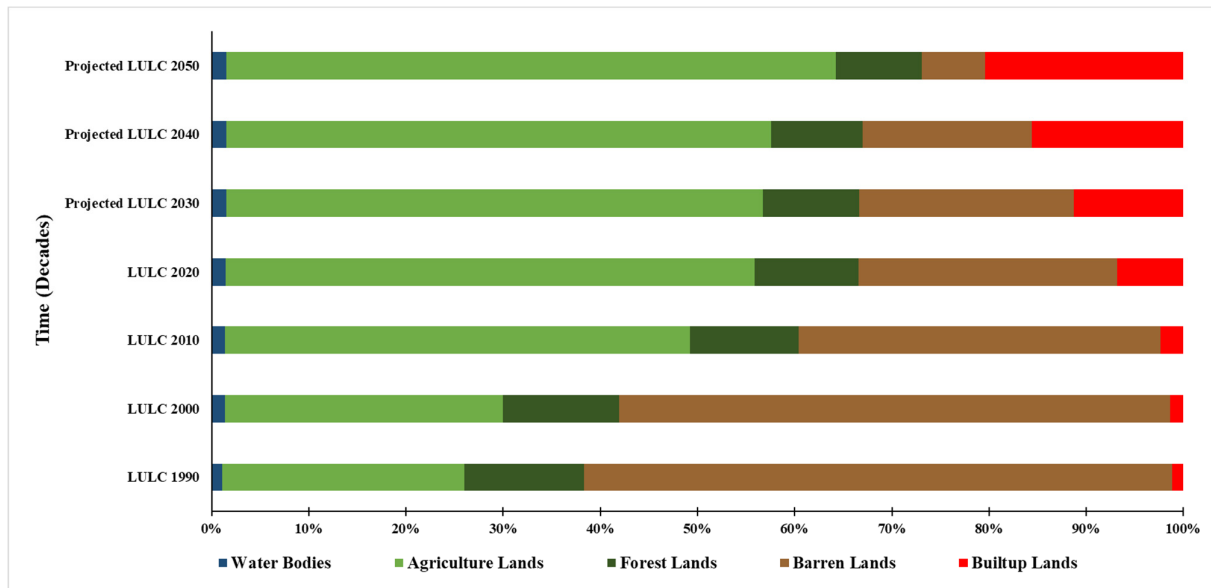

Figure S2. Temporal variance of LULC, historical and projected.

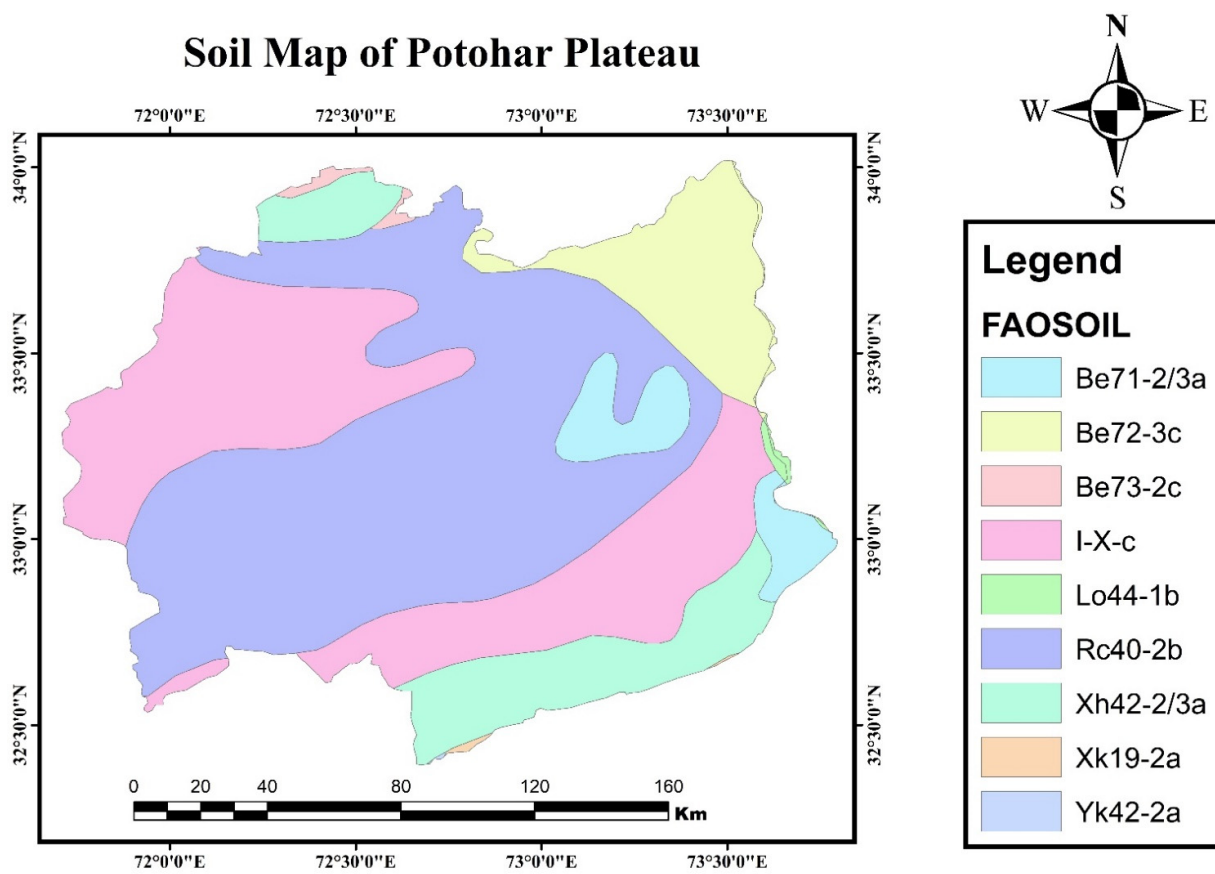

Figure S3. Soil map of Potohar Plateau.

**Table S5.** Global sensitivity values and ranks.

| Parameters       | Soan River Basin |        |         | Kanshi River Basin |        |         | Haro River Basin |        |         |
|------------------|------------------|--------|---------|--------------------|--------|---------|------------------|--------|---------|
|                  | Rank             | t-stat | P-value | Rank               | t-stat | P-value | Rank             | t-stat | P-value |
| r_CN2.mgt        | 1                | -23.53 | 0.00000 | 1                  | -16.86 | 0.00000 | 1                | 28.94  | 0.00000 |
| v_ALPHA_BF.gw    | 2                | 6.71   | 0.00048 | 24                 | 0.07   | 0.00039 | 29               | -0.01  | 0.00500 |
| v_GW_DELAY.gw    | 3                | 2.90   | 0.00032 | 3                  | 3.68   | 0.00940 | 2                | 1.16   | 0.00025 |
| v_GWQMN.gw       | 4                | 4.46   | 0.00015 | 4                  | 2.91   | 0.00000 | 4                | -4.39  | 0.00000 |
| v_TIMP.bsn       | 24               | 1.07   | 0.00039 | 2                  | 5.70   | 0.00100 | 3                | -1.80  | 0.07295 |
| v_SURLAG.bsn     | 21               | -0.57  | 0.00057 | 21                 | 0.33   | 0.00074 | 21               | -0.39  | 0.00070 |
| v_SHALLST.gw     | 5                | -2.03  | 0.04300 | 5                  | -7.22  | 0.00000 | 5                | 6.67   | 0.00000 |
| v_GW_REVAP.gw    | 6                | 1.02   | 0.00308 | 6                  | 5.16   | 0.00000 | 6                | -0.26  | 0.00798 |
| v_RCHRG_DP.gw    | 7                | -0.49  | 0.00623 | 7                  | -3.88  | 0.00013 | 7                | 4.59   | 0.00000 |
| v_ALPHA_BNK.rte  | 8                | 8.04   | 0.00186 | 8                  | 5.23   | 0.00000 | 8                | 3.18   | 0.00160 |
| v_CANMX.hru      | 9                | 3.21   | 0.00100 | 9                  | 1.95   | 0.05187 | 9                | 3.29   | 0.00112 |
| v_CH_N2.rte      | 10               | 0.51   | 0.61600 | 10                 | 0.58   | 0.00563 | 12               | -1.69  | 0.00900 |
| v_CH_K2.rte      | 11               | -2.32  | 0.02100 | 12                 | -2.17  | 0.03074 | 10               | -1.55  | 0.00122 |
| v_ESCO.hru       | 12               | -6.10  | 0.00196 | 11                 | -4.21  | 0.00004 | 11               | 7.20   | 0.00000 |
| v_GW_SPYLD.gw    | 25               | -0.52  | 0.04300 | 29                 | 0.19   | 0.00390 | 13               | -1.20  | 0.00231 |
| v_GWHT.gw        | 26               | 0.84   | 0.04700 | 28                 | 1.44   | 0.00470 | 22               | -0.99  | 0.00323 |
| v_OV_N.hru       | 13               | 0.60   | 0.55100 | 13                 | -1.59  | 0.00112 | 14               | -1.67  | 0.00960 |
| v_REVAPMN.gw     | 27               | -0.43  | 0.03200 | 27                 | -0.13  | 0.00897 | 15               | 0.78   | 0.00434 |
| v_SLSUBBSN.hru   | 14               | 1.70   | 0.09100 | 14                 | -0.17  | 0.00864 | 16               | 0.33   | 0.00742 |
| v_HRU_SLP.hru    | 15               | 1.84   | 0.06700 | 15                 | 1.75   | 0.08040 | 18               | -1.12  | 0.00265 |
| v_SNOCOVMX.bsn   | 29               | -0.19  | 0.00470 | 25                 | 0.63   | 0.04100 | 19               | 1.05   | 0.00294 |
| v_CH_S1.sub      | 28               | 1.34   | 0.00370 | 26                 | 0.94   | 0.03700 | 20               | -0.03  | 0.00977 |
| v_CH_K1.sub      | 16               | -3.58  | 0.00052 | 16                 | 1.63   | 0.00104 | 17               | -0.10  | 0.00143 |
| v_CH_N1.sub      | 23               | 1.14   | 0.00100 | 22                 | 0.69   | 0.00385 | 24               | 2.07   | 0.00099 |
| r_SOL_AWC(1).sol | 17               | -0.09  | 0.00926 | 17                 | -0.35  | 0.00726 | 25               | 0.86   | 0.03210 |
| r_SOL_K(1).sol   | 18               | -2.15  | 0.03200 | 18                 | -1.75  | 0.08099 | 26               | 0.84   | 0.04700 |
| r_SOL_BD(1).sol  | 19               | -0.20  | 0.00844 | 19                 | -0.88  | 0.00381 | 27               | -0.13  | 0.00897 |
| r_SOL_Z(1).sol   | 20               | 0.74   | 0.00478 | 20                 | 0.62   | 0.00534 | 23               | -0.23  | 0.00470 |
| r_SOL_ALB(1).sol | 22               | 0.89   | 0.00485 | 23                 | 2.14   | 0.00200 | 28               | 0.34   | 0.00370 |

**Table S6.** List of most sensitive parameters with best-fitted values.

| Parameter     | Range   |       | Soan Basin | Kanshi Basin | Haro Basin |
|---------------|---------|-------|------------|--------------|------------|
|               | Initial | Final |            |              |            |
| r_CN2.mgt     | -0.2    | 0.2   | -0.17      | -0.13        | -0.15      |
| v_ALPHA_BF.gw | 0       | 1     | 0.36       | 0.28         | 0.52       |
| v_GW_DELAY.gw | 100     | 500   | 259.74     | 244.98       | 347.6      |
| v_GWQMN.gw    | 1000    | 5000  | 4337.71    | 3363.23      | 4469.02    |
| v_SHALLST.gw  | 1000    | 5000  | 4125.89    | 4453.73      | 4801.43    |

|                   |      |     |        |        |         |
|-------------------|------|-----|--------|--------|---------|
| v__GW_REVAP.gw    | 0.05 | 0.2 | 0.22   | 0.19   | 0.27016 |
| v__RCHRG_DP.gw    | 0    | 1   | -0.22  | -0.41  | -0.13   |
| v__ALPHA_BNK.rte  | 0    | 1   | 0.91   | 0.83   | 1.06    |
| v__CANMX.hru      | 0    | 150 | 101.20 | 77.56  | 136.84  |
| v__CH_N2.rte      | 0.1  | 0.3 | 0.25   | 0.23   | 0.27    |
| v__CH_K2.rte      | 0    | 500 | -59.04 | -77.85 | 23.12   |
| v__ESCO.hru       | 0    | 1   | 0.54   | 0.34   | 0.74    |
| v__OV_N.hru       | 0.1  | 1   | 1.27   | 1.02   | 1.32    |
| v__SLSUBBSN.hru   | 10   | 150 | 66.76  | 66.19  | 101.07  |
| v__HRU_SLP.hru    | 0    | 0.6 | 0.36   | 0.14   | 0.49    |
| v__CH_K1.sub      | 50   | 300 | 250.45 | 162.27 | 290.77  |
| r__SOL_AWC(1).sol | -0.1 | 0.1 | -0.03  | -0.07  | 0.01    |
| r__SOL_K(1).sol   | -0.1 | 0.1 | -0.19  | -0.24  | -0.18   |
| r__SOL_BD(1).sol  | -0.1 | 0.2 | 0.40   | 0.21   | 0.46    |
| r__SOL_Z(1).sol   | -0.1 | 0.2 | 0.17   | 0.16   | 0.27    |
| v__SURLAG.bsn     | 0    | 24  | 36.56  | 29.21  | 38.93   |
| v__REVAPMN.gw     | 0    | 500 | 300.17 | 499.19 | 261.90  |

Table S7. Quantitative analysis of classified and simulated LULC 2020.

| Class Name          | 2020 Classi-fied | 2020 Pro-jected | 2020 Classi-fied (%) | 2020 Projected (%) | Differ-ence in Area | % Differ-ence |
|---------------------|------------------|-----------------|----------------------|--------------------|---------------------|---------------|
| Water Bodies        | 338.76           | 334.69          | 1.46                 | 1.44               | -4.07               | -0.02         |
| Agricul-tural Lands | 12655.54         | 12439.41        | 54.43                | 53.63              | -216.13             | -0.8          |
| Forest Area         | 2478.51          | 2335.59         | 10.66                | 10.07              | -142.92             | -0.59         |
| Barren Lands        | 6190.87          | 6289.47         | 26.63                | 27.11              | +98.6               | +0.48         |
| Built-up Area       | 1585.67          | 1800.17         | 6.82                 | 7.75               | +215.50             | +0.93         |

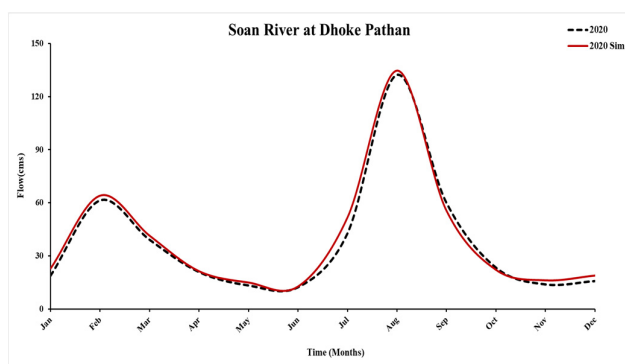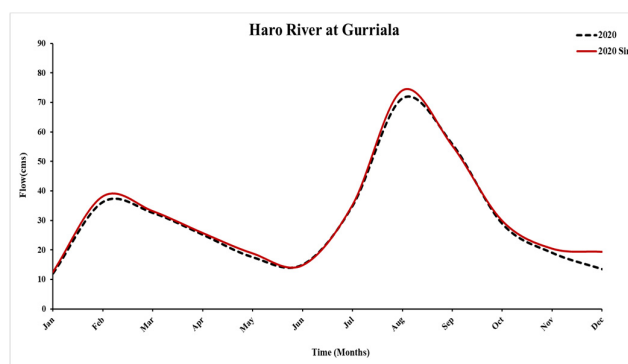

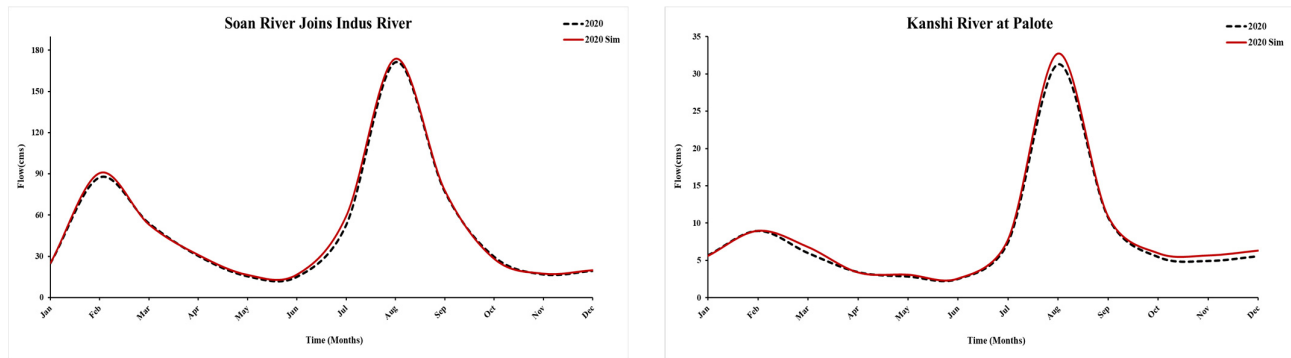

Figure S4. Streamflow evaluation of classified and simulated LULC 2020.

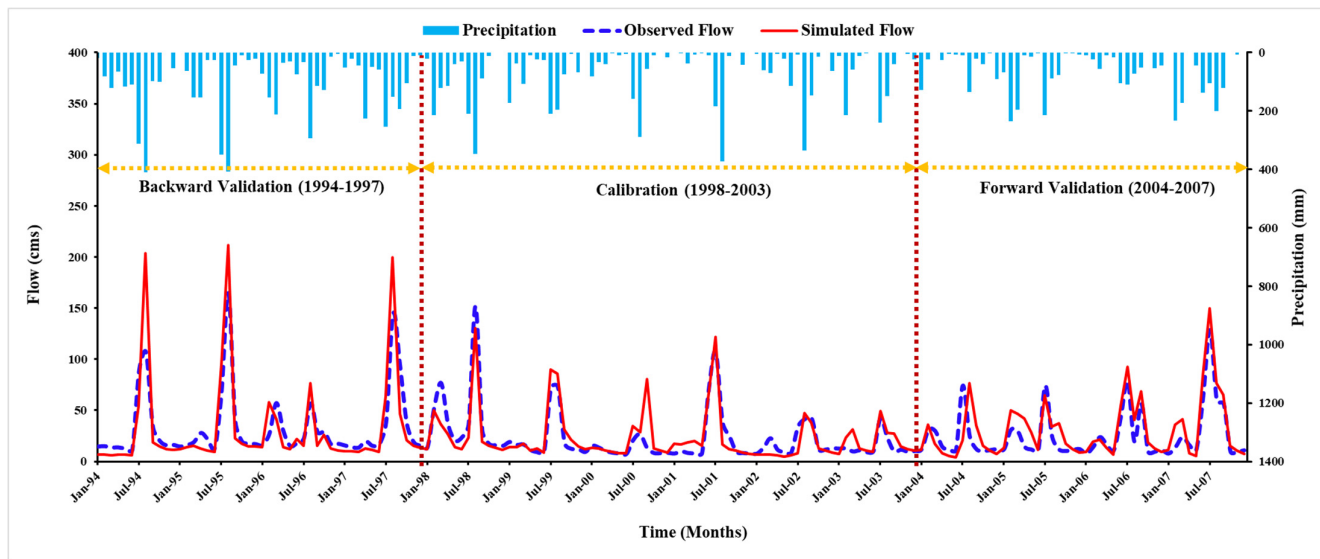

Figure S5. Calibration and validations of stream flows, Haro River Basin.

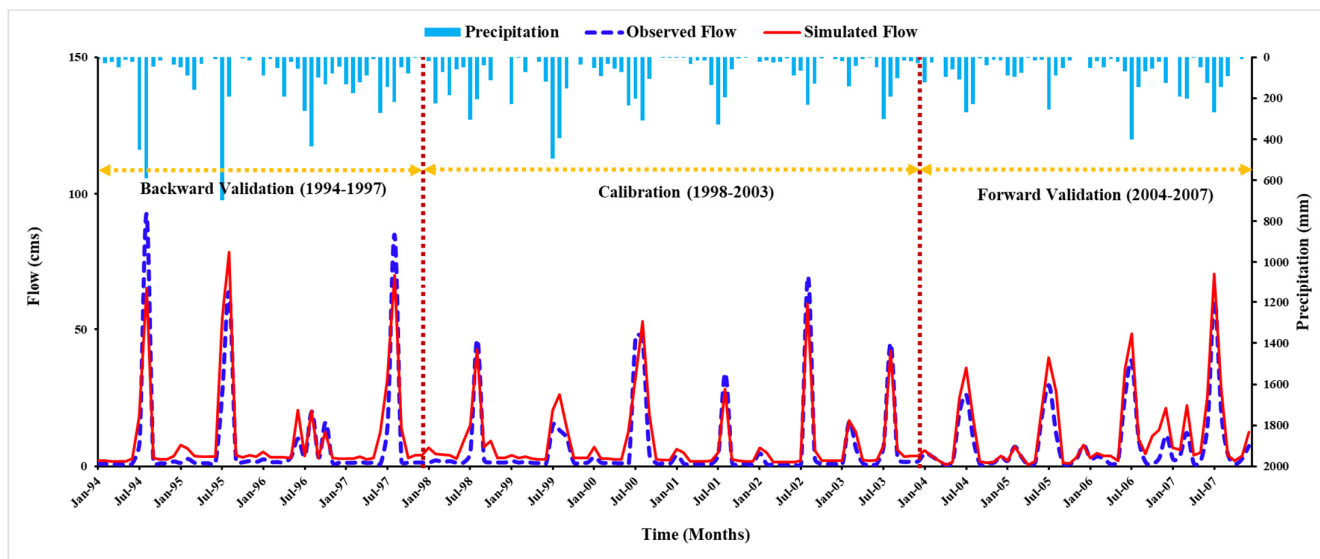

Figure S6. Calibration and validations of stream flows, Kanshi River Basin.

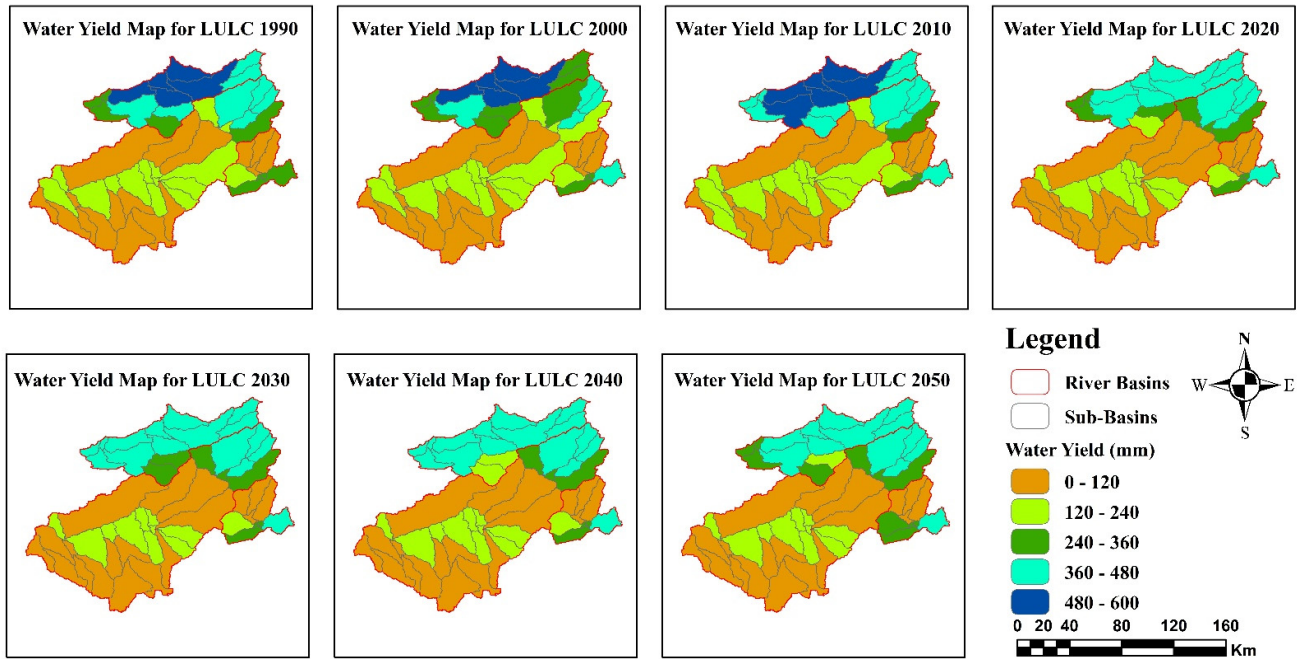

**Figure S7.** Spatial and temporal distribution of variations in simulated in water yield.

$$W_{\text{yield}} = Q_{\text{surface}} + Q_{\text{gw}} + Q_{\text{lat}} - T_{\text{losses}} \quad (\text{S1})$$



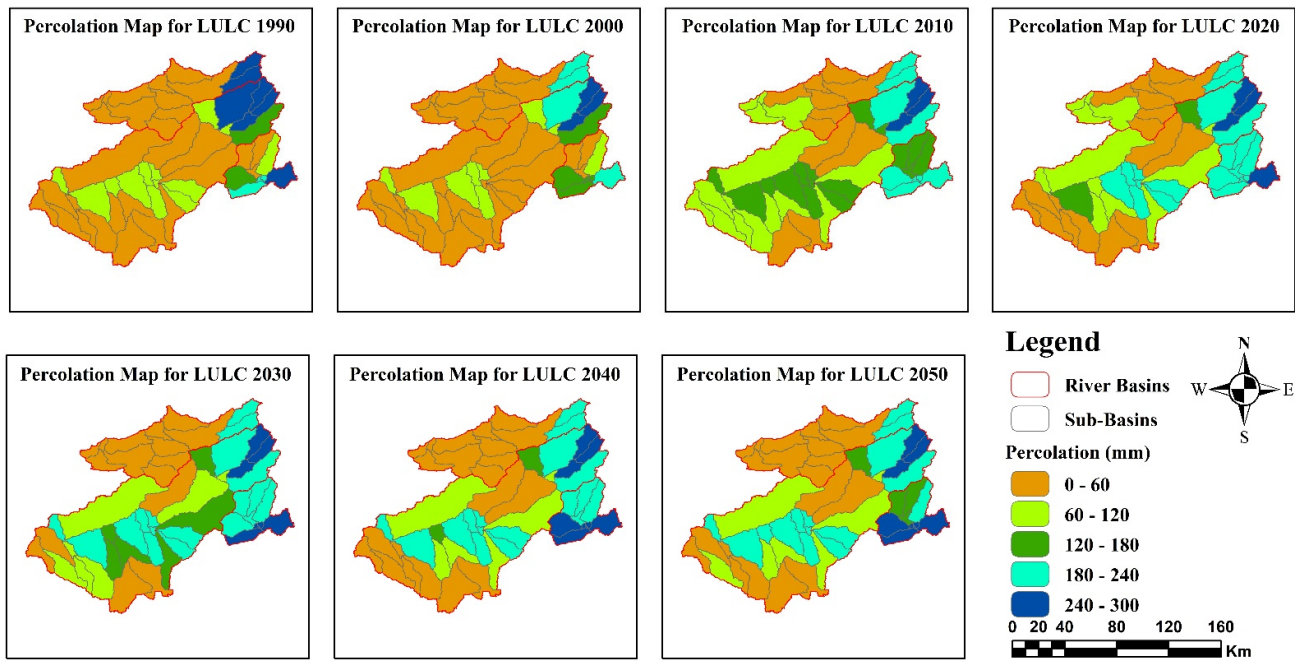

Figure S8. Spatiotemporal patterns of percolation under LULC scenarios.

$$pe_i = (\Theta_i - FC_i) * [1 - e^{\frac{-\Delta t}{t_i}}] \quad (S2)$$

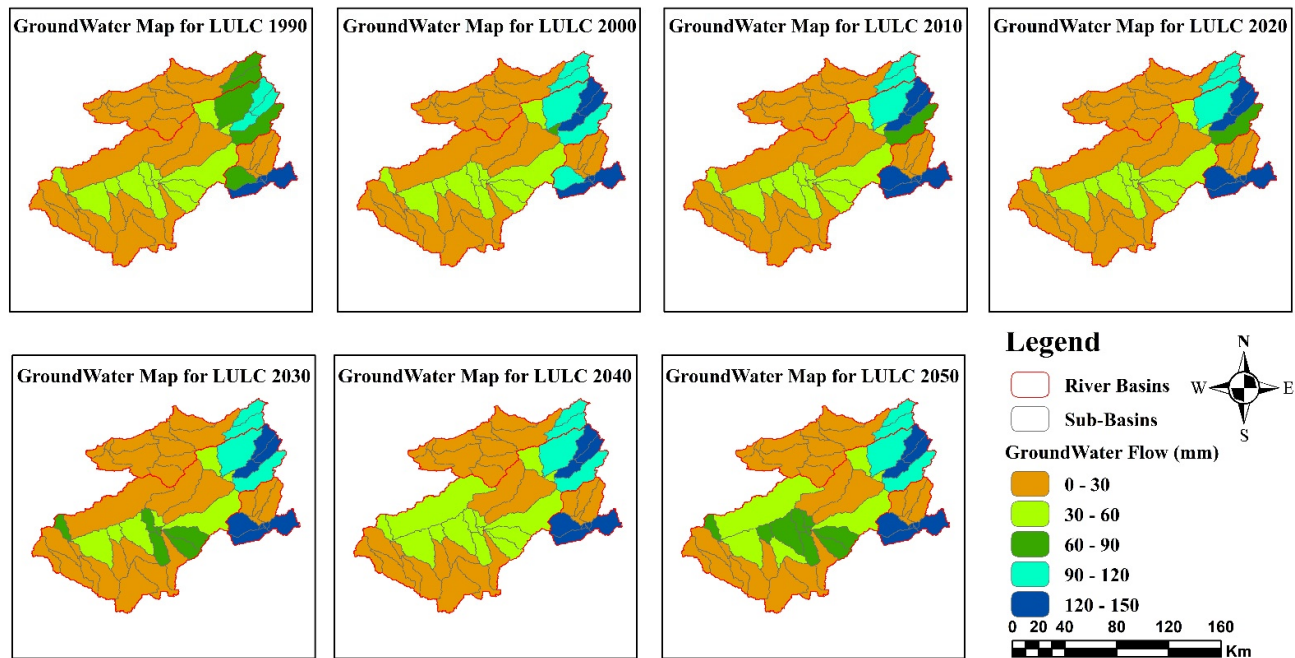

Figure S9. Spatiotemporal patterns of groundwater flow under LULC scenarios.

$$(Q_{gw})_j = (Q_{gw})_{j-1} * e^{(-\alpha_{gw} \Delta t)} + W_{recharge}(1 - e^{(-\alpha_{gw} \Delta t)}) \quad (S3)$$

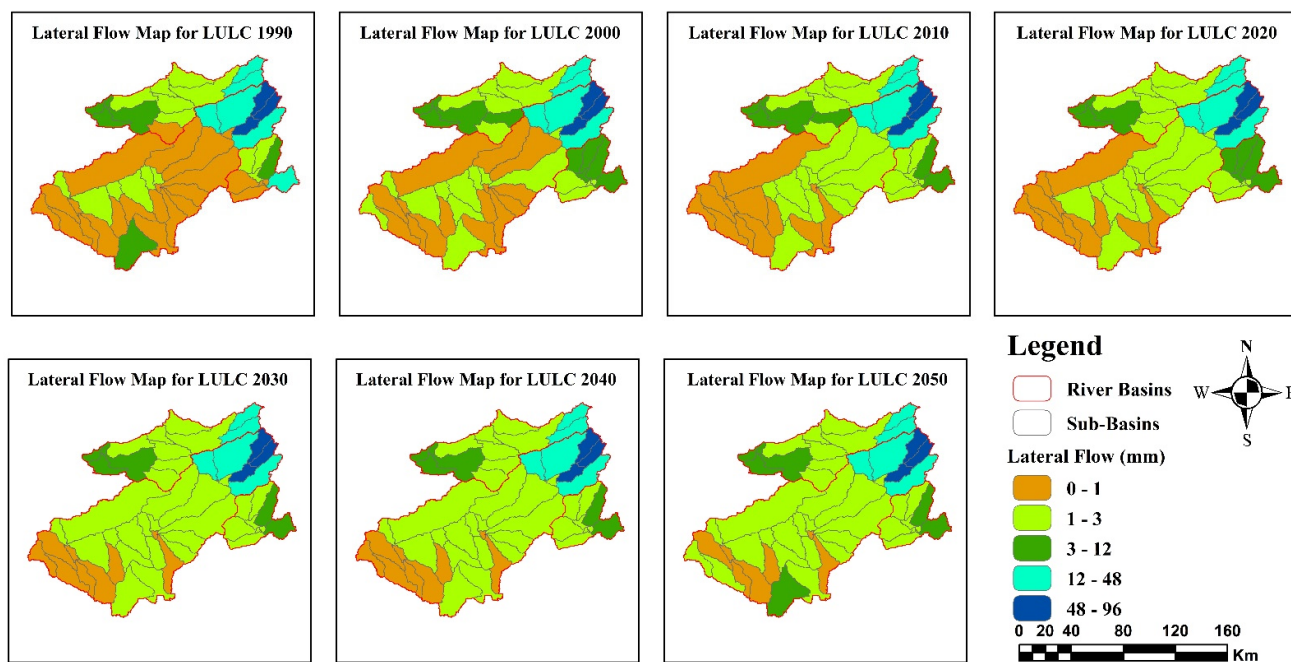

**Figure S10.** Spatiotemporal patterns of lateral flow under LULC scenarios.

$$Q_{lat} = 0.024 * \frac{2SSC \sin \alpha}{\theta_d L} \quad (S4)$$

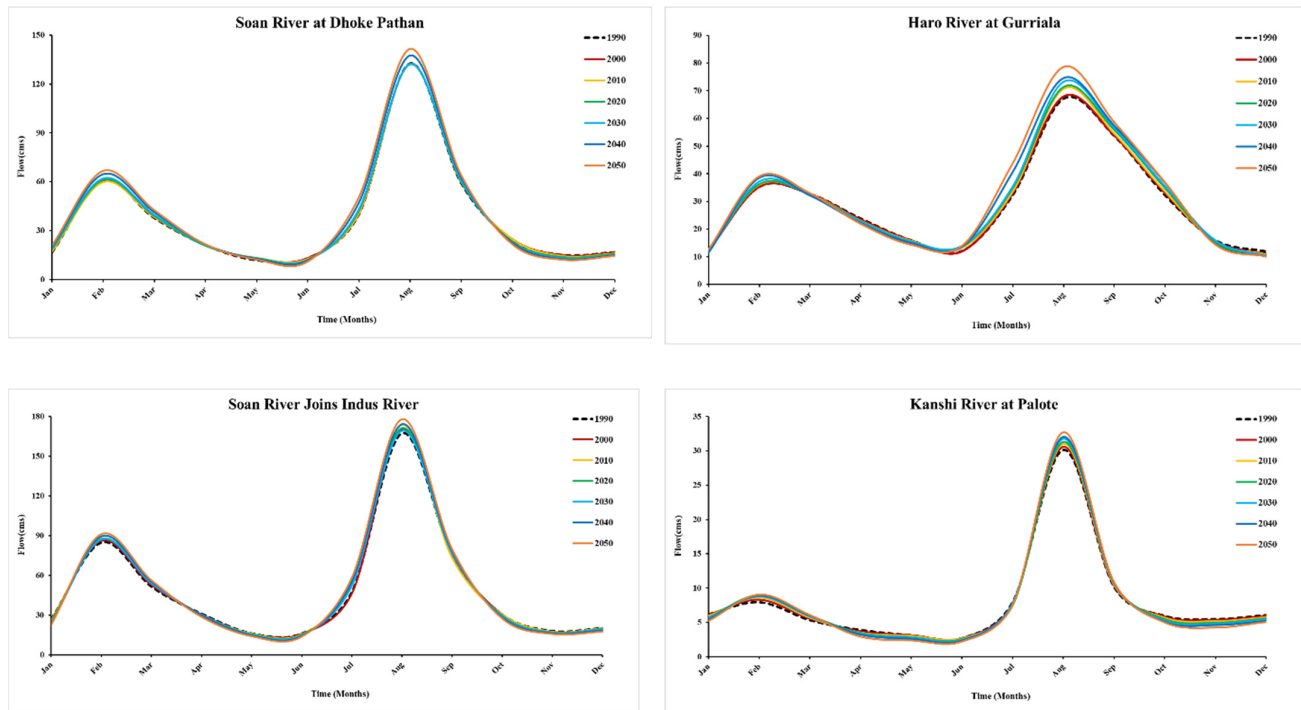

**Figure S11.** Seasonal variation of flow regime under LULC scenarios at different hydrometric stations.
